# Supplementary material
Source: publisher figshare collection journal article supplement (https://f1000.figshare.com/ndownloader/files/1411417)
Supplement: Supplementary file 1 [file 1411417]

Down from the platform(sec)			Number of grids crossed
nTg	A53T		nTg	A53T
2	12		47	13
4	10		40	44
25	28		43	38
1	71		45	54
17	42		91	34
10	48		107	26
12	65		67	19
20	30		60	41
	32			3
	11			11
	7			6
	64			33
